# Supplementary material for: Widespread plant specialization in the polyphagous planthopper Hyalesthes obsoletus (Cixiidae), a major vector of stolbur phytoplasma: Evidence of cryptic speciation
Source: PubMed Central journal article supplement (PMC5940214; doi:10.1371/journal.pone.0196969), 2018-05-08
Supplement: pone.0196969.s003.pdf [file pone.0196969.s003.pdf]

**S1 Table Literature data overview on wild and cultivated plants associated with *Hyalesthes obsoletus* feeding, aggregation and/or development resulting in polyphagous perception of this vector.**

| Country                             | Plant                             | Note                             | Reference                 |                    |
|-------------------------------------|-----------------------------------|----------------------------------|---------------------------|--------------------|
| Russia                              | <i>Convolvulus arvensis</i>       | nymphs and adults                | Sukhov & Razvyazkina 1955 |                    |
|                                     | <i>Lepidium draba</i>             |                                  |                           |                    |
|                                     | <i>Solanum tuberosum</i> (potato) | adults                           | Imo <i>et al.</i> 2013    |                    |
| Turkey                              | <i>Cistus</i> sp.                 | adults                           | Hoch & Remane 1985        |                    |
|                                     | <i>Crataegus</i> sp.              |                                  |                           |                    |
|                                     | <i>Myrtus</i> sp.                 |                                  |                           |                    |
|                                     | <i>Paliurus</i> sp.               |                                  |                           |                    |
|                                     | <i>Quercus coccifera</i>          |                                  |                           |                    |
|                                     | <i>Quercus ilex</i>               |                                  |                           |                    |
|                                     | <i>Rubus</i> sp.                  |                                  |                           |                    |
|                                     | <i>Sesamum indicum</i>            |                                  |                           |                    |
|                                     | <i>Vitex</i> sp.                  |                                  |                           |                    |
|                                     | <i>Capsicum anuum</i> (paprika)   |                                  |                           |                    |
|                                     | <i>Convolvulus arvensis</i>       | overwintering hosts for the      |                           | Güclü & Ozbek 1988 |
|                                     | <i>Crambe orientalis</i>          | nymphs; adults aggregate         |                           |                    |
|                                     | <i>Falcaria vulgaris</i>          | mainly on <i>Medicago sativa</i> |                           |                    |
|                                     | <i>Geranium tuberosum</i>         | but also found on diverse        |                           |                    |
|                                     | <i>Isatis glauca</i>              | crops (potato, sugar beet,       |                           |                    |
| <i>Lepidium draba</i>               | sainfoin, red clover, bean        |                                  |                           |                    |
| <i>Melilotus officinalis</i>        | and rarely sunflower and          |                                  |                           |                    |
| <i>Onosuma armeneum</i>             | squash)                           |                                  |                           |                    |
| <i>Rumex crispus</i>                |                                   |                                  |                           |                    |
| <i>Taraxacum</i> sp.                |                                   |                                  |                           |                    |
| <i>Medicago sativa</i> (alfalfa)    |                                   |                                  |                           |                    |
| <i>Onobrichis sativa</i> (sainfoin) |                                   |                                  |                           |                    |
| Israel                              | <i>Tamarix</i> sp.                | adults                           | Hoch & Remane 1985        |                    |
|                                     | <i>Gossypium</i> sp. (cotton)     |                                  |                           |                    |
|                                     | <i>Solanum tuberosum</i> (potato) |                                  |                           |                    |
|                                     | <i>Zea mays</i> (corn)            |                                  |                           |                    |
|                                     | <i>Amaranthus retroflexus</i>     | adults;                          | Sharon <i>et al.</i> 2005 |                    |
|                                     | <i>Convolvulus arvensis</i>       | nymphs were found on the         |                           |                    |
|                                     | <i>Myrtus communis</i>            | <i>V. agnus-castus</i> roots     |                           |                    |
| <i>Olea europaea</i> ,              |                                   |                                  |                           |                    |

*Vitex agnus-castus*  
*Vitis vinifera* (grapevine)

---

|        |                                 |                              |                    |
|--------|---------------------------------|------------------------------|--------------------|
| Greece | <i>Acer campestre</i>           | adults;                      | Hoch & Remane 1985 |
|        | <i>Arbutus</i> sp.              | the most common host         |                    |
|        | <i>Arundo</i> sp.               | plant is <i>Vitex</i> sp. in |                    |
|        | <i>Artemisia</i> sp.            | coastline habitats           |                    |
|        | <i>Carpinus betulus</i>         |                              |                    |
|        | <i>Cistus</i> sp.               |                              |                    |
|        | <i>Convolvulus</i> sp.          |                              |                    |
|        | <i>Crataegus</i> sp.            |                              |                    |
|        | <i>Cynodon</i> sp.              |                              |                    |
|        | <i>Erica arborea</i>            |                              |                    |
|        | <i>Euphorbia dendroides</i>     |                              |                    |
|        | <i>Galium</i> sp.               |                              |                    |
|        | <i>Hipparhenia hirta</i>        |                              |                    |
|        | <i>Imperata cylindrica</i>      |                              |                    |
|        | <i>Juncus</i> sp.               |                              |                    |
|        | <i>Ligustrum vulgare</i>        |                              |                    |
|        | <i>Myrtus</i> sp.               |                              |                    |
|        | <i>Oreganum</i> sp.             |                              |                    |
|        | <i>Quercus coccifera</i>        |                              |                    |
|        | <i>Quercus cerris</i>           |                              |                    |
|        | <i>Quercus ilex</i>             |                              |                    |
|        | <i>Quercus pubescens</i>        |                              |                    |
|        | <i>Paliurus</i> sp.             |                              |                    |
|        | <i>Phragmites</i> sp.           |                              |                    |
|        | <i>Platanus</i> sp.             |                              |                    |
|        | <i>Populus</i> sp.              |                              |                    |
|        | <i>Prunus spinosa</i>           |                              |                    |
|        | <i>Pteridium</i> sp.            |                              |                    |
|        | <i>Rubus</i> sp.                |                              |                    |
|        | <i>Salix</i> sp.                |                              |                    |
|        | <i>Tamarix</i> sp.              |                              |                    |
|        | <i>Ulmus</i> sp.                |                              |                    |
|        | <i>Vitex</i> sp.                |                              |                    |
|        | <i>Capsicum anuum</i> (paprika) |                              |                    |
|        | <i>Gossypium</i> sp. (cotton)   |                              |                    |
|        | <i>Sesamum indicum</i> (sesame) |                              |                    |

*Solanum tuberosum* (potato)

*Zea mays* (corn)

|                                                          |                                                                                                                                                                                                                                                                                                 |                                                                                                                              |                                    |
|----------------------------------------------------------|-------------------------------------------------------------------------------------------------------------------------------------------------------------------------------------------------------------------------------------------------------------------------------------------------|------------------------------------------------------------------------------------------------------------------------------|------------------------------------|
| Cyprus and Greek islands (Crete, Lesbos, Ikaria, Rhodes) | <i>Arbutus</i> sp.<br><i>Arundo</i> sp.<br><i>Erica arborea</i><br><i>Euphorbia dendroides</i><br><i>Imperata cylindrica</i><br><i>Juncus</i> sp.<br><i>Phragmites</i> sp.<br><i>Platanus</i> sp.<br><i>Pteridium</i> sp.<br><i>Tamarix</i> sp.<br><i>Quercus pubescens</i><br><i>Vitex</i> sp. | adults;<br>the most common host plant is <i>Vitex</i> sp. in coastline habitats                                              | Hoch & Remane 1985                 |
| Romania                                                  | <i>Solanum tuberosum</i> (potato)                                                                                                                                                                                                                                                               | adults                                                                                                                       | Imo <i>et al.</i> 2013             |
| Macedonia                                                | <i>Convolvulus arvensis</i><br><i>Urtica dioica</i>                                                                                                                                                                                                                                             | adults collected using sweep net and mouth aspirator                                                                         | Atanasova <i>et al.</i> 2015       |
| Montenegro                                               | <i>Convolvulus arvensis</i><br><i>Urtica dioica</i><br><i>Vitex agnus-castus</i>                                                                                                                                                                                                                | adults collected using sweep net and mouth aspirator                                                                         | Kosovac <i>et al.</i> 2016         |
| Serbia                                                   | <i>Convolvulus arvensis</i>                                                                                                                                                                                                                                                                     |                                                                                                                              | Aleksić <i>et al.</i> 1967         |
|                                                          | various vineyard weeds                                                                                                                                                                                                                                                                          | first data of <i>Crepis foetida</i> as a member of weed community where adults were non selectively captured by sweeping net | Cvrković Tatjana, PhD thesis, 2010 |
|                                                          | <i>Convolvulus arvensis</i><br><i>Urtica dioica</i><br><i>Crepis foetida</i>                                                                                                                                                                                                                    | adults collected using sweep net and mouth aspirator                                                                         | Kosovac <i>et al.</i> 2013         |
| Bosnia and Herzegovina                                   | <i>Convolvulus arvensis</i><br><i>Vitex agnus-castus</i>                                                                                                                                                                                                                                        | adults collected using sweep net and mouth aspirator                                                                         | Đurić <i>et al.</i> 2017           |
| Croatia                                                  | <i>Vitex agnus-castus</i>                                                                                                                                                                                                                                                                       | very often found on <i>V. agnus-castus</i>                                                                                   | Horváth 1891                       |
| Slovenia                                                 | <i>Convolvulus arvensis</i><br><i>Urtica dioica</i>                                                                                                                                                                                                                                             | adults collected using yellow sticky traps or by sweep net sampling                                                          | Mehle <i>et al.</i> 2011           |

|             |                                                                                                                                                 |                                                                                                                                                                      |                            |
|-------------|-------------------------------------------------------------------------------------------------------------------------------------------------|----------------------------------------------------------------------------------------------------------------------------------------------------------------------|----------------------------|
|             | <i>Convolvulus arvensis</i><br><i>Urtica dioica</i>                                                                                             | adults collected on a single plant species with an exhaustor or with sweep nets in monoculture plant stands                                                          | Imo <i>et al.</i> 2013     |
| Hungary     | <i>Urtica dioica</i>                                                                                                                            | adults collected with D-Vac aspirators                                                                                                                               | Palermo <i>et al.</i> 2004 |
| Austria     | <i>Urtica dioica</i><br><i>Convolvulus arvensis</i>                                                                                             | association with <i>U. dioica</i> is dominant                                                                                                                        | Aryan <i>et al.</i> 2014   |
| Switzerland | <i>Urtica dioica</i><br><i>Convolvulus arvensis</i>                                                                                             | adults collected with mouth aspirators mainly on <i>U. dioica</i> ; nymphs present on the root in the field and confirmed as laboratory plant for nymphs development | Kessler <i>et al.</i> 2011 |
|             | <i>Calystegia sepium</i><br><i>Lepidium draba</i><br><i>Cardaria draba</i><br><i>Clematis vitalba</i>                                           | adults were captured on yellow sticky traps positioned above the specific plant                                                                                      |                            |
|             | <i>Polygonum aviculare</i><br><i>Calystegia sepium</i><br><i>Taraxatum officinale</i><br><i>Plantago lanceolata</i><br><i>Calystegia sepium</i> | adults were taken with a D-vac vacuum insect collector                                                                                                               |                            |
| Germany     | <i>Convolvulus arvensis</i><br><i>Festuca</i> sp.<br><i>Allium</i> sp.                                                                          | on limestone                                                                                                                                                         | Hoch & Remane 1985         |
|             | <i>Convolvulus arvensis</i><br><i>Solanum nigrum</i><br><i>Vitis vinifera</i> (grapevine)                                                       |                                                                                                                                                                      | Maixner 1994               |
|             | <i>Ranunculus bulbosus</i>                                                                                                                      |                                                                                                                                                                      | Weber & Maixner 1998       |
|             | <i>Convolvulus arvensis</i><br><i>Urtica dioica</i><br><i>Calystegia sepium</i>                                                                 |                                                                                                                                                                      | Langer & Maixner 2004      |
| France      | <i>Calystegia sepium</i><br><i>Cardaria draba</i><br><i>Convolvulus arvensis</i>                                                                | adults collected by sweeping net                                                                                                                                     | Sforza <i>et al.</i> 1999  |

*Galium verum*  
*Lavandula angustifolia*  
*Linaria striata*  
*Plantago cynops*  
*Satureia montana*

|                |                                                                                                            |                                                                                                                |                            |
|----------------|------------------------------------------------------------------------------------------------------------|----------------------------------------------------------------------------------------------------------------|----------------------------|
|                | <i>Convolvulus arvensis</i><br><i>Urtica dioica</i>                                                        | adults collected with D-Vac aspirators                                                                         | Bressan <i>et al.</i> 2008 |
|                | <i>Salvia sclarea</i>                                                                                      | adults collected with D-Vac aspirators and yellow sticky traps; nymphs collected on uprooted individual plants | Chuche <i>et al.</i> 2018  |
|                | <i>Convolvulus arvensis</i><br><i>Urtica dioica</i>                                                        | adults collected with D-Vac aspirators and yellow sticky traps                                                 |                            |
|                | <i>Lavandula angustifolia</i> (lavander)<br><i>Lavandula x intermedia</i> (lavandin)                       | adults were captured on yellow sticky traps in fields planted with diverse lavender and lavandin cultivars     | Yvin <i>et al.</i> 2017    |
|                | <i>Salvia sclarea</i>                                                                                      | nymphs counted on uprooted plants; adults collected with emergence traps                                       | Hossard <i>et al.</i> 2018 |
|                | <i>Convolvulus arvensis</i><br><i>Lavandula hybrida</i>                                                    | adults collected with emergence traps                                                                          |                            |
| Spain          | <i>Trifolium pratense</i>                                                                                  |                                                                                                                | Hoch & Remane 1985         |
|                | <i>Convolvulus arvensis</i>                                                                                |                                                                                                                | Sabate <i>et al.</i> 2014  |
| Italy          | <i>Urtica dioica</i><br><i>Convolvulus arvensis</i>                                                        | nymphs found on <i>U. dioica</i> roots                                                                         | Lessio <i>et al.</i> 2007  |
| Italy (Sicily) | <i>Dactylis</i> sp.<br><i>Juncus</i> sp.<br>fam. <i>Lamiaceae</i><br><i>Ulmus</i> sp.<br><i>Urtica</i> sp. |                                                                                                                | Hoch & Remane 1985         |
| Morocco        | <i>Clematis</i> sp.<br><i>Pistacia</i> sp.<br><i>Tamarix</i> sp<br><i>Quercus coccifera</i>                |                                                                                                                | Hoch & Remane 1985         |

## References

- Atanasova B, Jakovljević M, Spasov D, Jović J, Mitrović M, Toševski I, Cvrković T (2015) The molecular epidemiology of bois noir grapevine yellows caused by ‘*Candidatus Phytoplasma solani*’ in the Republic of Macedonia. *European Journal of Plant Pathology*, **142**, 759-770.
- Aleksić Ž, Šutić D, Aleksić D (1967) Transmission intensity of stolbur virus by means of *Hyalesthes obsoletus* Sign. on some host plants. *Plant Protection*, **93–95**, 67–73.
- Aryan A, Brader G, Mörtel J, Pastar M, Riedle-Bauer M (2014) An abundant ‘*Candidatus Phytoplasma solani*’ Stolbur tuf b phytoplasma strain is associated with grapevine, stinging nettle and *Hyalesthes obsoletus*. *European Journal of Plant Pathology*, **140**, 213-227.
- Bressan A, Sémétey O, Nusillard B, Clair D, Boudon-Padieu E (2008) Insect vectors (Hemiptera: Cixiidae) and pathogens associated with the disease syndrome “basses richesses” of sugar beet in France. *Plant Disease*, **92**(1), 113-119.
- Chuche J, Danet JL, Rivoal JB, Arricau-Bouvery N, Thiéry D (2018) Minor cultures as hosts for vectors of extensive crop diseases: Does *Salvia sclarea* act as a pathogen and vector reservoir for lavender decline? *Journal of Pest Science*, 91(1), 145-155.
- Cvrković T (2010) Diverzitet faune cikada u vinogradima Srbije i njihova uloga u prenošenju Bois Noir fitoplazme. PhD thesis, Faculty of Agriculture, University of Belgrade, 1-101.
- Durić Z, Hrnčić S, Delić D (2017) Morphological and molecular identification of *Hyalesthes obsoletus* Signoret (Auchenorrhyncha: Cixiidae) in Herzegovina vineyard. *Mitteilungen Klosterneuburg* **67**, 177-181
- Güclü S, Ozbek H (1988) Some studies on the biology of *Hyalestes obsoletus* Signoret (Homoptera: Cixidae) in the conditions of Erzurum. *Turkiye-Entomoloji-Dergisi*, **12**, 103-111.
- Hoch H, Remane R (1985) Evolution und Speziation der Zikaden-Gattung *Hyalesthes* Signoret, 1865 (Homoptera Auchenorrhyncha Fulgoroidea Cixiidae). *Marburger Entomologische Publikationen*, **2**, 1-427.
- Horváth G (1891) Hemipterološki izlet u Primorje i Plitvička jezera. *Glasnik Hrvatskoga Naravoslovnoga Društva (Societas historico-naturalis Croatica)*, VI (1-5), 29-49.
- Hossard L, Guimier S, Vinatier F, Barbier JM, Delmotte S, Fontaine M, Rivoal JB (2018) Source of *Hyalesthes obsoletus* Signoret planthopper (Hemiptera: Cixiidae) in southern France and potential effects of landscape. *Bulletin of Entomological Research*, **108**, 213-222.

- Imo M, Maixner M, Johannesen J (2013) Sympatric diversification vs. immigration: deciphering host-plant specialization in a polyphagous insect, the stolbur phytoplasma vector *Hyalesthes obsoletus* (Cixiidae). *Molecular Ecology*, **22**, 2188-2203.
- Kessler S, Schaerer S, Delabays N, Turlings TC, Trivellone V, Kehrl P (2011) Host plant preferences of *Hyalesthes obsoletus*, the vector of the grapevine yellows disease ‘bois noir’, in Switzerland. *Entomologia Experimentalis et Applicata*, **139**, 60-67.
- Kosovac A, Johannesen J, Krstić O, Mitrović M, Cvrković T, Maixner M, Toševski I, Jović J (2013) Microsatellite and mtDNA evidence of genetic differentiation in *Hyalesthes obsoletus* populations associated with a new major host, stinking hawk’s-beard (*Crepis foetida*), in southeast Europe. *Proceedings of the 3rd European Bois Noir Workshop*, Barcelona, 18-19.
- Kosovac A, Radonjić S, Hrnčić S, Krstić O, Toševski I, Jović J (2016) Molecular tracing of the transmission routes of bois noir in Mediterranean vineyards of Montenegro and experimental evidence for the epidemiological role of *Vitex agnus-castus* (Lamiaceae) and associated *Hyalesthes obsoletus* (Cixiidae). *Plant Pathology*, **65**, 285-298.
- Langer M, Maixner M (2004) Molecular characterisation of grapevine yellows associated phytoplasmas of the stolbur group based on RFLP analysis of non-ribosomal DNA. *Vitis*, **43**, 191–199.
- Lessio F, Tedeschi R, Alma A (2007) Population dynamics, host plants and infection rate with Stolbur phytoplasma of *Hyalesthes obsoletus* Signoret in north-western Italy. *Journal of Plant Pathology*, **89**, 97-102.
- Maixner M (1994) Research note: Transmission of German grapevine yellows (Vergilbungskrankheit) by the planthopper *Hyalesthes obsoletus* (Auchenorrhyncha: Cixiidae). *Vitis*, **33**, 103-104.
- Palermo S, Elekes M, Botti S, Ember I, Alma A, Orosz A, Bertaccini A, Kölber M (2004). Presence of stolbur phytoplasma in Cixiidae in Hungarian vineyards. *Vitis*, **43**(4), 201-203.
- Sabaté J, Laviña A, Batlle A (2014) Incidence of Bois Noir phytoplasma in different viticulture regions of Spain and Stolbur isolates distribution in plants and vectors. *European Journal of Plant Pathology*, **139**, 185-193.
- Sforza R, Bourgoin T, Wilson SW, Boudon-Padieu E (1999) Field observations, laboratory rearing and descriptions of immatures of the planthopper *Hyalesthes obsoletus* (Hemiptera: Cixiidae). *European Journal of Entomology*, **96**, 409–418.

- Sharon R, Soroker V, Wesley SD, Zahavi T, Harari A, Weintraub PG (2005) *Vitex agnus-castus* is a preferred host plant for *Hyalesthes obsoletus*. *Journal of Chemical Ecology*, **31**, 1051-1063.
- Suhov KS, Vovk AM (1949) Stolbur of solanaceous plants. USSR Academy of Sciences Publishers. 7-11.
- Weber A, Maixner M (1998) Survey of populations of the planthopper *Hyalesthes obsoletus* Sign.(Auchenorrhyncha, Cixiidae) for infection with the phytoplasma causing grapevine yellows in Germany. *Journal of Applied Entomology*, **122**, 375-381.
- Yvin C, Chaisse E, Fontaine M, Rivoal JB, Verdin E, Nicolè F, Jourdan P, Savarit P, Gallois P (2017) Dépérissement de la lavande et du lavandin: mise en oeuvre d'un programme de recherches appliquées afin d'apporter des solutions de lutte aux producteurs. *Innovations Agronomiques*, **55**, 107-120.
