# Supplementary material for: Widespread plant specialization in the polyphagous planthopper Hyalesthes obsoletus (Cixiidae), a major vector of stolbur phytoplasma: Evidence of cryptic speciation
Source: PubMed Central journal article supplement (PMC5940214; doi:10.1371/journal.pone.0196969), 2018-05-08
Supplement: pone.0196969.s004.pdf [file pone.0196969.s004.pdf]

**S2 Table** Primers used for amplification of mitochondrial *COI-tRNA(Leu)-COII* and *16S-tRNA(Leu)-ND1* gene regions in *Hyalesthes obsoletus* and archival paratype specimen of *H. thracicus*.

| Gene region               | Primer name | Primer sequence (5'→3')    | Short amplicon length (with primers) | Main amplicon length (with primers) |
|---------------------------|-------------|----------------------------|--------------------------------------|-------------------------------------|
| <i>COI-tRNA(Leu)-COII</i> | S2792       | ATACCTCGACGTTATTCAGA       | 291 bp                               | S2792/A3661                         |
|                           | Hy-TL-R1*   | GRTTTWCTTTMTAGAYGAATTTTAAG |                                      | 898 bp                              |
|                           | Hy-TL-F1*   | TGGCAGAAAAGTGCTRTGAA       | 383 bp                               |                                     |
|                           | Hy-COII-R1* | TCATATCTTCARTATCATTGATG    |                                      |                                     |
|                           | Hy-COII-F1* | CCATCAATTTCDATYAAAACHATAGG | 320 bp                               |                                     |
|                           | A3661       | CCACAAATTTCTGAACATTGACCA   |                                      |                                     |
| <i>16S-tRNA(Leu)-ND1</i>  | LR-N-12945  | CGACCTCGATGTTGAATTAA       | 347 bp                               | LR-N-12945/                         |
|                           | Hy-ND1-R1*  | TTWCGAAAYTGAATATAWCC       |                                      | N1-J-12261                          |
|                           | Hy-ND1-F1*  | GTTGCTTAYTTTATTCTTCTTGA    | 380 bp                               | 671 bp                              |
|                           | N1-J-12261  | TCGTAAGAAATTATTTGAGC       |                                      |                                     |

\*Degenerate primers designed in this study for amplification of short fragments in the archival specimen of *H. thracicus*. Design based on sequence alignment comparison among *Hyalesthes philesakis*, *H. luteipes*, *H. ponticorum*, *H. aylanus*, *Reptalus panzeri*, *R. melanochaetus*, *R. cuspidatus* and *Setapius apiculatus*.
