# Supplementary material for: Widespread plant specialization in the polyphagous planthopper Hyalesthes obsoletus (Cixiidae), a major vector of stolbur phytoplasma: Evidence of cryptic speciation
Source: PubMed Central journal article supplement (PMC5940214; doi:10.1371/journal.pone.0196969), 2018-05-08
Supplement: pone.0196969.s005.pdf [file pone.0196969.s005.pdf]

Kosovac A, Johannesen J, Krstić O, Mitrović M, Cvrković T, Toševski I, Jović J: Widespread plant specialization in the polyphagous planthopper *Hyalesthes obsoletus* (Cixiidae), a major vector of stolbur phytoplasma: evidence of cryptic speciation

**S3 Table** List of *Hyalesthes obsoletus* newly identified haplotypes of the two mtDNA gene regions with corresponding GenBank accession numbers and data on host-plant associations.

| Gene region               | Haplotype†    | NCBI Accession number | Associated host-plant         |
|---------------------------|---------------|-----------------------|-------------------------------|
| <i>COI-tRNA(Leu)-COII</i> | S             | KY368699              | <i>Convolvulus arvensis</i>   |
|                           | X             | KY368700              | <i>Convolvulus arvensis</i>   |
|                           | π (pi)        | KY368701              | <i>Convolvulus arvensis</i>   |
|                           | ψ (psi)       | KY368702              | <i>Convolvulus arvensis</i>   |
|                           | α (alpha)     | KY368703              | <i>Urtica dioica</i>          |
|                           | β (beta)      | KY368704              | <i>Urtica dioica</i>          |
|                           | ξ (xi)        | KY368705              | <i>Urtica dioica</i>          |
|                           | R             | KY368706              | <i>Urtica dioica</i>          |
|                           | ρ (rho)       | KY368707              | <i>Urtica dioica</i>          |
|                           | ω (omega)     | KY368708              | <i>Urtica dioica</i>          |
|                           | W             | KY368709              | <i>U. dioica, C. arvensis</i> |
|                           | J             | KY368710              | <i>Crepis foetida</i>         |
|                           | M             | KY368711              | <i>Crepis foetida</i>         |
|                           | U             | KY368712              | <i>Crepis foetida</i>         |
|                           | V             | KY368713              | <i>Crepis foetida</i>         |
|                           | λ (lambda)    | KY368714              | <i>Crepis foetida</i>         |
|                           | μ (mu, micro) | KY368715              | <i>Crepis foetida</i>         |
|                           | Y             | KY368716              | <i>Vitex agnus-castus</i>     |
|                           | Z             | KY368717              | <i>Vitex agnus-castus</i>     |
|                           | γ (gamma)     | KY368718              | <i>Vitex agnus-castus</i>     |
|                           | η (eta)       | KY368719              | <i>Vitex agnus-castus</i>     |
|                           | σ (sigma)     | KY368720              | <i>Vitex agnus-castus</i>     |
|                           | θ (theta)     | KY368721              | <i>Vitex agnus-castus</i>     |
|                           | P             | KY368722              | crop plant                    |
| φ (phi)                   | KY368723      | crop plant            |                               |
| Q                         | KY368724      | crop plant            |                               |
| <i>16S-tRNA(Leu)-ND1</i>  | K             | KY368692              | <i>Convolvulus arvensis</i>   |
|                           | L             | KY368693              | <i>Convolvulus arvensis</i>   |
|                           | Q             | KY368694              | <i>Urtica dioica</i>          |
|                           | H             | KY368695              | <i>Crepis foetida</i>         |
|                           | M             | KY368696              | <i>Vitex agnus-castus</i>     |
|                           | N             | KY368697              | <i>Vitex agnus-castus</i>     |
|                           | O             | KY368698              | <i>Vitex agnus-castus</i>     |

† Letter names for Greek alphabet are given in parentheses
