# Supplementary material for: Widespread plant specialization in the polyphagous planthopper Hyalesthes obsoletus (Cixiidae), a major vector of stolbur phytoplasma: Evidence of cryptic speciation
Source: PubMed Central journal article supplement (PMC5940214; doi:10.1371/journal.pone.0196969), 2018-05-08
Supplement: pone.0196969.s006.pdf [file pone.0196969.s006.pdf]

Kosovac A, Johannesen J, Krstić O, Mitrović M, Cvrković T, Toševski I, Jović J: Widespread plant specialization in the polyphagous planthopper *Hyalesthes obsoletus* (Cixiidae), a major vector of stolbur phytoplasma: evidence of cryptic speciation

**S4 Table** Neutrality tests for the *Hyalesthes obsoletus* host-plant grouped populations and the overall dataset based on mtDNA *COI-tRNA(Leu)-COII* and *16S-tRNA(Leu)-NDI* data.

| Dataset (N)                      | n  | Neutrality tests          |                           |
|----------------------------------|----|---------------------------|---------------------------|
|                                  |    | Tajima's <i>D</i>         | Fu's <i>F<sub>S</sub></i> |
| <i>Crepis foetida</i> (83)       | 6  | -1.04433 (p = 0.16800)    | -2.56721 (p = 0.07400)    |
| <i>Vitex agnus-castus</i> (56)   | 8  | 1.95886 (p = 0.97300)     | 2.65819 (p = 0.84600)     |
| <i>Convolvulus arvensis</i> (57) | 8  | -0.43667 (p = 0.39500)    | -0.54393 (p = 0.44400)    |
| <i>Urtica dioica</i> (120)       | 9  | -2.18859 (p = 0.00100)*** | -8.59152 (p = 0.00000)*** |
| <i>Convolvulus-Urtica</i> (177)  | 15 | -1.87421 (p = 0.00500)**  | -9.59790 (p = 0.00100)*** |
| Total (316)                      | 29 | -0.31990 (p = 0.38200)    | -3.16897 (p = 0.30700)    |

n, number of haplotypes.

\*p < 0.05; \*\*p < 0.01; \*\*\*p < 0.001.
