# Supplementary material for: Widespread plant specialization in the polyphagous planthopper Hyalesthes obsoletus (Cixiidae), a major vector of stolbur phytoplasma: Evidence of cryptic speciation
Source: PubMed Central journal article supplement (PMC5940214; doi:10.1371/journal.pone.0196969), 2018-05-08
Supplement: pone.0196969.s007.pdf [file pone.0196969.s007.pdf]

**S5 Table** Average evolutionary distances calculated for the *COI-COII* gene region (711 bp) for 37 *H. obsoletus* haplotypes (excluding the Q,  $\phi$  and P, and the Israeli G and H derived haplotypes), corrected by applying the HKY+I substitution model. Range values are placed in brackets. N-number of haplotypes within each group; *d1*-average divergence among all sequence pairs; *d2*-average divergence among sequence pairs within host-plant associated groups; *D*-average divergence among sequence pairs between groups.

| <i>Hyalesthes obsoletus</i><br>host-plant associated<br>haplotype group | N  | <i>d1</i>              | <i>d2</i>              | <i>D</i>               |                        |                        |                        |
|-------------------------------------------------------------------------|----|------------------------|------------------------|------------------------|------------------------|------------------------|------------------------|
|                                                                         |    |                        |                        | 1                      | 2                      | 3                      | 4                      |
| 1. <i>ex Convolvulus</i>                                                | 12 | 0.010<br>(0.000-0.027) | 0.004<br>(0.001-0.009) | -                      |                        |                        |                        |
| 2. <i>ex Urtica</i>                                                     | 17 |                        | 0.004<br>(0.001-0.007) | 0.004<br>(0.000-0.009) | -                      |                        |                        |
| 3. <i>ex Vitex</i>                                                      | 6  |                        | 0.005<br>(0.001-0.011) | 0.018<br>(0.010-0.025) | 0.016<br>(0.009-0.021) | -                      |                        |
| 4. <i>ex Crepis</i>                                                     | 6  |                        | 0.003<br>(0.001-0.004) | 0.020<br>(0.014-0.027) | 0.018<br>(0.012-0.025) | 0.012<br>(0.007-0.017) | -                      |
| <i>Hyalesthes thracicus</i>                                             | -  | -                      | -                      | 0.038<br>(0.033-0.043) | 0.037<br>(0.031-0.043) | 0.029<br>(0.025-0.032) | 0.029<br>(0.025-0.032) |
