# Supplementary material for: Widespread plant specialization in the polyphagous planthopper Hyalesthes obsoletus (Cixiidae), a major vector of stolbur phytoplasma: Evidence of cryptic speciation
Source: PubMed Central journal article supplement (PMC5940214; doi:10.1371/journal.pone.0196969), 2018-05-08
Supplement: pone.0196969.s008.pdf [file pone.0196969.s008.pdf]

**S6 Table** AMOVA  $F$ -statistical comparison of genetic divergence within and between *Hyalesthes obsoletus* populations grouped according to host-plant associations or geography. The results present the percent of total among-population divergence that can be attributed to groups ( $F_{CT}$ ) or to the within-group variance ( $F_{SC}$ ).

| Analysis                                                                                                                                                                                                                                      | Overall genetic variance | Variance within group | Variance between group (host-plant or geography) | % of the total variance attributed to host-plant or geography |
|-----------------------------------------------------------------------------------------------------------------------------------------------------------------------------------------------------------------------------------------------|--------------------------|-----------------------|--------------------------------------------------|---------------------------------------------------------------|
|                                                                                                                                                                                                                                               | $F_{ST}$                 | $F_{SC}$              | $F_{CT}$                                         | $F_{CT}/F_{ST} \times 100\%$                                  |
| All 50 <i>H. obsoletus</i> populations genotyped in this study and single population associated with <i>V. agnus-castus</i> from Israel, grouped according to host-plant                                                                      | 0.180***                 | 0.047***              | 0.139***                                         | 77%                                                           |
| Montenegrin and Greek <i>H. obsoletus</i> populations from <i>V. agnus-castus</i> , grouped according to regional affiliation                                                                                                                 | 0.097***                 | 0.041***              | 0.059*                                           | 60%                                                           |
| Montenegrin and Greek <i>H. obsoletus</i> populations from <i>V. agnus-castus</i> and single population associated with <i>V. agnus-castus</i> from Israel, grouped according to regional affiliation (2 clusters) as classified by STRUCTURE | 0.108***                 | 0.064***              | 0.046**                                          | 42%                                                           |

\* $p < 0.05$ ; \*\* $p < 0.01$ ; \*\*\* $p < 0.001$ .
